# Supplementary material
Source: Copernicus journal article supplement (doi:10.5194/tc-20-2531-2026)
Supplement: Supplementary file 1 [file tc-20-2531-2026-supplement.pdf]

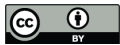

*Supplement of*

## **Understanding slow glacier flow under climate change: A case study on Vernagtferner, Austria**

**Theresa Dobler et al.**

*Correspondence to:* Theresa Dobler ([theresa.dobler@hm.edu](mailto:theresa.dobler@hm.edu)) and Christoph Mayer ([christoph.mayer@lrz.badw-muenchen.de](mailto:christoph.mayer@lrz.badw-muenchen.de))

The copyright of individual parts of the supplement might differ from the article licence.

## Section S1 Data overview

| dataset                    | date of acquisition                                           | sensor/instruments                                                   | resolution [m] | processing                                                                              | covered area                                       | source / access                                                                                                                                                                                    | dataproducer     |
|----------------------------|---------------------------------------------------------------|----------------------------------------------------------------------|----------------|-----------------------------------------------------------------------------------------|----------------------------------------------------|----------------------------------------------------------------------------------------------------------------------------------------------------------------------------------------------------|------------------|
| stake measurement          | Yearly, end of september [1966-2023]                          | multiple forward intersections, bathymetric polar coordinate or GNSS | /              | remove gross errors                                                                     | entire glacier, mainly ablation area               | <a href="https://doi.org/10.1594/PANGAEA.854595">https://doi.org/10.1594/PANGAEA.854595</a>                                                                                                        |                  |
| glacier bed topography     | 2022-08-04, 2022-07-10, 2020-09-21, 2023-08-08<br>2006 & 2007 | multi-frequency GNSS receiver<br>Radar transmitter, with antenna     | 20             | post-processing with fixed ambiguities<br>see Mayer et al 2013                          | Parts of Taschach and Brochhogel<br>entire glacier | <a href="https://doi.org/10.5281/zenodo.172590496">https://doi.org/10.5281/zenodo.172590496</a><br><a href="https://doi.org/10.5281/zenodo.172590496">https://doi.org/10.5281/zenodo.172590496</a> | Mayer et al 2013 |
|                            | 2022-07-10 and 2022-09-21                                     | UAV DJI with optical RGB camera                                      | 0,04           | Georeferenzierung with ground control points, orthophotogrammetrie in Agisoft Metashape | Parts of Taschach and Brochhogel                   |                                                                                                                                                                                                    |                  |
| Orthofotos                 | 2018-09-16                                                    | Optical airborne photogrammetry, UltraCam Eagle Mark 2               | 0.2            | Aerotriangulation: Inpho(Match-AT) by Trimble, orthofoto generation: SUPE (nFrames)     | entire glacier                                     | publication do to legal rights not possible                                                                                                                                                        | Geissler 2021    |
|                            | 2020-09-08                                                    | Optical airborne photogrammetry                                      | 0.2            | see Iris Tiro                                                                           | entire glacier                                     | publication do to legal rights not possible                                                                                                                                                        |                  |
|                            | 2021-09-23                                                    | Optical airborne photogrammetry                                      | 0.2            | information not available                                                               | entire glacier                                     | publication do to legal rights not possible                                                                                                                                                        |                  |
|                            | 1989                                                          | aerial photogrammetry                                                | 20             | information not available                                                               | entire glacier                                     | <a href="https://doi.org/10.5281/zenodo.172590496">https://doi.org/10.5281/zenodo.172590496</a>                                                                                                    |                  |
|                            | 1982-09-14                                                    | aerial photogrammetry                                                | 20             | information not available                                                               | entire glacier                                     | <a href="https://doi.org/10.5281/zenodo.172590496">https://doi.org/10.5281/zenodo.172590496</a>                                                                                                    |                  |
|                            | 1980-08-24                                                    | aerial photogrammetry                                                | 20             | information not available                                                               | entire glacier                                     | <a href="https://doi.org/10.5281/zenodo.172590496">https://doi.org/10.5281/zenodo.172590496</a>                                                                                                    |                  |
| DSM                        | 1989-09-09                                                    | aerial photogrammetry                                                | 20             | information not available                                                               | entire glacier                                     | <a href="https://doi.org/10.5281/zenodo.172590496">https://doi.org/10.5281/zenodo.172590496</a>                                                                                                    | Wehr 2013        |
|                            | 2009                                                          | Laserscanning                                                        | 1              | information not available                                                               | entire glacier                                     | <a href="https://doi.org/10.5281/zenodo.172590496">https://doi.org/10.5281/zenodo.172590496</a>                                                                                                    |                  |
|                            | 2016-09-29                                                    | aerial photogrammetry, Canon EOS 50 Mark II                          | 1              | Photogrammetric analysis: PIX-4D 4.2.27                                                 | entire glacier                                     | <a href="https://doi.org/10.5281/zenodo.172590496">https://doi.org/10.5281/zenodo.172590496</a>                                                                                                    |                  |
|                            | 2018                                                          | aerial photogrammetry, UltraCam Eagle Mark 2                         | 2              | Aerotriangulation: Inpho(Match-AT) by Trimble, DSM generation: SUPE (nFrames)           | entire glacier                                     | publication do to legal rights not possible                                                                                                                                                        | Geissler 2021    |
| glacier outline            | 1969, 1979, 1990, 1999, 2009, 2016, 2018                      |                                                                      | /              | information not available                                                               | entire glacier                                     | <a href="https://doi.org/10.5281/zenodo.172590496">https://doi.org/10.5281/zenodo.172590496</a>                                                                                                    |                  |
| mass balance               | yearly, 1966-2024                                             | glaciological mass balance                                           | /              |                                                                                         | entire glacier                                     | WGMS                                                                                                                                                                                               |                  |
|                            |                                                               | ITS_LIVE                                                             | /              | see Gardiner et al 2022                                                                 | entire glacier                                     | Gardiner et al 2022                                                                                                                                                                                |                  |
| global dataset ice dynamic |                                                               | FAU's glacierportal                                                  | /              | see Friedl et al 2021                                                                   | entire glacier                                     | Friedl et al 2021                                                                                                                                                                                  |                  |
|                            |                                                               | Milan's dataset                                                      | /              | see Milan et al 2022                                                                    | entire glacier                                     | Milan et al 2022                                                                                                                                                                                   |                  |
| satellite SAR imagery      | see Appendix C                                                | Terra-SAR-X                                                          | 2              | GAMMA Remote sensing Software                                                           | entire glacier                                     |                                                                                                                                                                                                    |                  |

Fig. S1: Overview of all datasets used in this study.

## Section S2 Stake network overview

Table S1: Stake overview (observation period and altitude range).

| ID  | Period    | Alt. range [m] |
|-----|-----------|----------------|
| 10  | 1973–1977 | 3015–3027      |
| 80  | 1980–2007 | 3154–3175      |
| 100 | 1985–1992 | 2782–2816      |
| 110 | 1969–1982 | 2836–2851      |
| 113 | 1966–1998 | 2796–2880      |
| 114 | 1969–1980 | 2858–2876      |
| 116 | 1966–1981 | 2881–2952      |
| 117 | 1966–1986 | 2852–2959      |
| 118 | 1966–1999 | 2827–2938      |
| 123 | 1966–1999 | 2846–2962      |
| 141 | 2011–2014 | 2881–2893      |
| 142 | 2014–2016 | 2876–2883      |
| 150 | 1985–1994 | 2797–2839      |
| 151 | 1985–1998 | 2876–2925      |
| 152 | 1973–2004 | 2882–2997      |
| 153 | 1985–2004 | 2917–2967      |
| 154 | 1970–1999 | 2902–2975      |
| 156 | 2013–2022 | 2891–2909      |
| 157 | 1991–2021 | 2900–2961      |
| 158 | 1996–2023 | 2911–2974      |
| 159 | 1997–2021 | 2922–2962      |
| 160 | 1996–2023 | 3008–3062      |
| 161 | 2012–2023 | 3069–3087      |
| 163 | 2012–2021 | 3157–3170      |
| 164 | 2010–2023 | 2951–2985      |
| 165 | 2010–2021 | 3120–3137      |
| 167 | 2012–2021 | 3034–3047      |
| 168 | 2012–2021 | 3234–3259      |
| 169 | 2015–2022 | 2951–2970      |
| 170 | 2015–2021 | 2995–3007      |
| 181 | 2020–2021 | 3062–3064      |
| 203 | 1976–2006 | 2929–3002      |
| 204 | 2010–2015 | 2901–2918      |
| 210 | 1966–2022 | 2911–2955      |
| 211 | 1967–1978 | 2912–2933      |
| 212 | 1966–1979 | 2954–2967      |
| 213 | 1966–1987 | 2940–2958      |
| 214 | 1968–1982 | 2947–2981      |
| 215 | 1968–1982 | 2933–2981      |
| 217 | 1966–1981 | 2936–2981      |
| 218 | 1968–1982 | 2936–2963      |
| 220 | 1966–1990 | 2890–2969      |
| 223 | 1968–2002 | 2937–3031      |
| 225 | 1973–2004 | 2971–3005      |
| 227 | 1969–2006 | 2897–3006      |
| 231 | 1985–2005 | 2911–2983      |
| 250 | 1983–2002 | 2937–2973      |
| 251 | 1985–2020 | 2920–3007      |
| 252 | 1980–2023 | 2903–3014      |
| 254 | 1984–2019 | 2917–3001      |
| 255 | 1985–2002 | 2971–3015      |
| 256 | 1985–2001 | 2990–3030      |
| 257 | 2011–2019 | 2914–2939      |
| 258 | 1985–2021 | 2937–2992      |
| 265 | 1988–2021 | 2949–3031      |
| 266 | 1990–2022 | 2944–3028      |
| 267 | 1985–2004 | 2936–2996      |
| 270 | 1968–2005 | 2879–2939      |
| 272 | 1991–2021 | 2959–3021      |
| 273 | 1997–2022 | 3055–3092      |
| 274 | 1997–2021 | 3023–3084      |
| 275 | 2000–2019 | 3001–3047      |
| 278 | 2010–2021 | 3063–3083      |
| 280 | 2010–2016 | 3134–3141      |
| 281 | 2011–2021 | 3150–3162      |
| 282 | 2011–2016 | 2965–2980      |
| 283 | 2011–2023 | 3085–3110      |
| 285 | 2012–2021 | 3025–3040      |
| 288 | 2012–2023 | 3112–3127      |

Note that the stakes may have gaps in their measured period due to melting and reinstallation.

## Dates and orbit information

Table S2: Dates and orbit information of the employed acquisitions.

| date       | orbit dir.<br>(ascending/descending) | rel. orbit<br>number | strip<br>number |
|------------|--------------------------------------|----------------------|-----------------|
| 2011-07-03 | D                                    | 78                   | 6               |
| 2011-07-14 | D                                    | 78                   | 6               |
| 2011-08-08 | A                                    | 131                  | 10              |
| 2013-07-01 | A                                    | 131                  | 10              |
| 2014-06-07 | A                                    | 131                  | 10              |
| 2017-07-11 | D                                    | 78                   | 6               |
| 2017-08-13 | D                                    | 78                   | 6               |
| 2017-08-24 | D                                    | 78                   | 6               |
| 2018-07-31 | D                                    | 78                   | 6               |
| 2018-08-22 | D                                    | 78                   | 6               |
| 2019-07-29 | D                                    | 78                   | 6               |
| 2019-08-31 | D                                    | 78                   | 6               |
| 2020-01-02 | A                                    | 131                  | 7               |
| 2020-01-30 | A                                    | 55                   | 1               |
| 2020-02-21 | A                                    | 55                   | 1               |
| 2020-02-26 | A                                    | 131                  | 7               |
| 2020-05-02 | A                                    | 131                  | 7               |
| 2020-05-08 | A                                    | 55                   | 1               |
| 2020-07-04 | D                                    | 78                   | 6               |
| 2020-07-26 | D                                    | 78                   | 6               |
| 2020-09-11 | A                                    | 131                  | 7               |
| 2020-09-17 | A                                    | 55                   | 1               |
| 2020-11-11 | A                                    | 55                   | 1               |
| 2020-12-25 | A                                    | 55                   | 1               |
| 2021-01-27 | A                                    | 55                   | 1               |
| 2021-02-01 | A                                    | 131                  | 7               |
| 2021-02-07 | A                                    | 55                   | 1               |
| 2021-02-23 | A                                    | 131                  | 7               |
| 2021-03-25 | D                                    | 78                   | 5               |
| 2021-03-28 | A                                    | 131                  | 7               |
| 2021-04-08 | A                                    | 131                  | 7               |
| 2021-04-30 | A                                    | 131                  | 7               |
| 2021-05-11 | A                                    | 131                  | 7               |
| 2021-06-13 | A                                    | 131                  | 7               |
| 2021-06-24 | A                                    | 131                  | 7               |
| 2021-07-05 | A                                    | 131                  | 7               |
| 2021-08-18 | A                                    | 131                  | 7               |
| 2021-08-26 | D                                    | 78                   | 6               |
| 2021-09-09 | A                                    | 131                  | 7               |
| 2021-09-17 | D                                    | 78                   | 6               |
| 2021-10-12 | A                                    | 131                  | 7               |
| 2021-11-14 | A                                    | 131                  | 7               |
| 2021-11-25 | A                                    | 131                  | 7               |
| 2022-03-04 | A                                    | 131                  | 7               |
| 2022-03-26 | A                                    | 131                  | 7               |
| 2022-04-06 | A                                    | 131                  | 7               |
| 2022-05-09 | A                                    | 131                  | 7               |
| 2022-05-20 | A                                    | 131                  | 7               |
| 2022-05-31 | A                                    | 131                  | 7               |
| 2022-06-11 | A                                    | 131                  | 7               |
| 2022-07-03 | A                                    | 131                  | 7               |
| 2022-07-25 | A                                    | 131                  | 7               |
| 2022-08-02 | D                                    | 78                   | 6               |
| 2022-09-18 | A                                    | 131                  | 7               |
| 2022-09-29 | A                                    | 131                  | 7               |
| 2022-10-21 | A                                    | 131                  | 7               |
